# Supplementary material for: Associations between Four Diet Quality Indexes and High Blood Pressure among Adults: Results from the 2015 Health Survey of Sao Paulo
Source: MDPI journal article supplement (doi:10.3390/nu16050629), 2024-02-24
Supplement: s1 [file s1]

**Figure S1.** Sample flowchart in the 2015 Health Survey of São Paulo with Focus on Nutrition (2015 ISA-Nutrition) eligible for the present study.

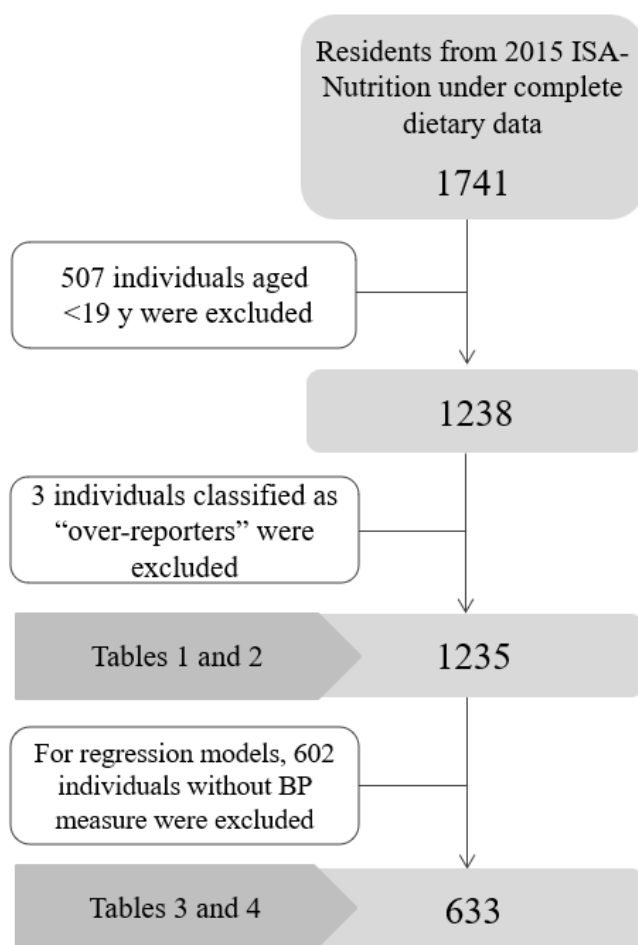

**Table S1.** Components and scoring of the AHEI, HEI-2020, BHEI, and DASH diet quality scores.

|                                              | AHEI <sup>1</sup>          |                            | HEI-2020 <sup>1</sup>           |                                   | BHEI <sup>1</sup>          |                            | DASH                       |                            |
|----------------------------------------------|----------------------------|----------------------------|---------------------------------|-----------------------------------|----------------------------|----------------------------|----------------------------|----------------------------|
|                                              | Standard for minimum score | Standard for maximum score | Standard for minimum score      | Standard for maximum score        | Standard for minimum score | Standard for maximum score | Standard for minimum score | Standard for maximum score |
| <b>Adequacy Components</b>                   |                            |                            |                                 |                                   |                            |                            |                            |                            |
| Total fruit                                  | –                          | –                          | 0                               | ≥0.8 cups equivalents /1,000 kcal | 0                          | ≥1 serving /1,000 kcal     | Quintile 1                 | Quintile 5                 |
| Whole fruit                                  | 0                          | ≥4 servings/d              | 0                               | ≥0.4 cups equivalents /1,000 kcal | 0                          | ≥0.5 serving /1,000 kcal   | –                          | –                          |
| Total vegetables                             | 0                          | ≥5 servings/d              | 0                               | ≥1.1 cups equivalents /1,000 kcal | 0                          | ≥1.0 serving /1,000 kcal   | Quintile 1                 | Quintile 5                 |
| Greens and Beans                             | –                          | –                          | 0                               | ≥0.2 cups equivalents /1,000 kcal | –                          | –                          | –                          | –                          |
| Dark green and orange vegetables and legumes | –                          | –                          | –                               | –                                 | 0                          | ≥0.5 serving /1,000 kcal   | –                          | –                          |
| Total grains                                 | –                          | –                          | –                               | –                                 | 0                          | ≥2 servings /1,000 kcal    | –                          | –                          |
| Whole grains                                 | 0                          | ≥90 g/d (m)<br>≥75 g/d (w) | 0                               | ≥1.5 oz equivalents /1,000 kcal   | 0                          | ≥1 serving /1,000 kcal     | Quintile 1                 | Quintile 5                 |
| Total dairy products                         | –                          | –                          | 0                               | ≥1.3 cups equivalents /1,000 kcal | –                          | ≥1.5 servings /1,000 kcal  | –                          | –                          |
| Low-fat dairy                                | –                          | –                          | –                               | –                                 | –                          | –                          | Quintile 1                 | Quintile 5                 |
| Nuts, seeds, legumes                         | 0                          | ≥1 serving/d               | –                               | –                                 | –                          | –                          | Quintile 1                 | Quintile 5                 |
| Total protein foods                          | –                          | –                          | 0                               | ≥2.5 oz equivalents /1,000 kcal   | 0                          | ≥1 serving /1,000 kcal     | –                          | –                          |
| Seafood and plant proteins                   | –                          | –                          | 0                               | ≥0.8 oz equivalents /1,000 kcal   | –                          | –                          | –                          | –                          |
| Polyunsaturated fatty acids                  | ≤2 % energy/d              | ≥10 % energy/d             | (PUFAs+MUFAs) / SFA≤1.2         | (PUFAs+MUFAs) / SFA≥2.5           | –                          | –                          | –                          | –                          |
| Oils                                         | –                          | –                          | –                               | –                                 | 0                          | ≥0.5 serving /1,000 kcal   | –                          | –                          |
| Long-chain n-3 fats                          | 0 mg/d                     | ≥250 mg/d                  | –                               | –                                 | –                          | –                          | –                          | –                          |
| <b>Moderation Components</b>                 |                            |                            |                                 |                                   |                            |                            |                            |                            |
| Refined grains                               | –                          | –                          | ≥4.3 oz equivalents /1,000 kcal | ≤1.8 oz equivalents /1,000 kcal   | –                          | –                          | –                          | –                          |
| Red and processed meats                      | ≥1.5 serving/d             | 0 servings/d               | –                               | –                                 | –                          | –                          | Quintile 5                 | Quintile 1                 |
| Sugar-sweetened beverages                    | ≥1 serving/d               | 0 servings/d               | –                               | –                                 | –                          | –                          | Quintile 5                 | Quintile 1                 |

|                                                                 |                   |                      |                 |                   |                 |                   |            |            |
|-----------------------------------------------------------------|-------------------|----------------------|-----------------|-------------------|-----------------|-------------------|------------|------------|
| Added sugar                                                     | –                 | –                    | ≥26% of energy  | ≤6.5% of energy   | –               | –                 | –          | –          |
| Alcoholic beverages <sup>2</sup>                                | ≥3.5 drinks/d (m) | 0.5-2.0 drinks/d (m) | –               | –                 | –               | –                 | –          | –          |
|                                                                 | ≥2.5 drinks/d (w) | 0.5-1.5 drinks/d (w) | –               | –                 | –               | –                 | –          | –          |
| Saturated fatty acids                                           | –                 | –                    | ≥16% of energy  | ≤8% of energy     | ≥15% of energy  | ≤7% of energy     | –          | –          |
| Trans fat                                                       | ≥4 % energy/d     | ≤0.5 % energy/d      | –               | –                 | –               | –                 | –          | –          |
| Calories from solid fats, alcoholic beverages, and added sugars | –                 | –                    | –               | –                 | ≥35% of energy  | ≤10% of energy    | –          | –          |
| Sodium                                                          | Highest decile    | Lowest decile        | ≥2g /1,000 kcal | ≤1.1g /1,000 kcal | ≥2g /1,000 kcal | ≤0.7g /1,000 kcal | Quintile 5 | Quintile 1 |
| <b>Range of scores</b>                                          | 0                 | 110                  | 0               | 100               | 0               | 100               | 8          | 40         |

Abbreviations: MUFA, monounsaturated fatty acid; PUFA, polyunsaturated fatty acid; SFA, saturated fatty acid; m, men; w, women.

<sup>1</sup>Intakes between the minimum and maximum levels are scored proportionately.

<sup>2</sup> In the design of the AHEI, authors assigned the highest score to moderate, and the lowest score to heavy, alcohol consumers. The nondrinkers received a score of 2.5. One drink is 4 oz of wine, 12 oz of beer, or 1.5 oz of liquor (1 oz = 28.35 g).
